# Supplementary material for: Molecular ordering of A(D–A′–D)2-based organic semiconductors through hydrogen bonding after simple cleavage oftert-butyloxycarbonyl protecting groups
Source: Royal Society of Chemistry journal article supplement (doi:10.1039/c7nj04440b), 2018-01-01
Supplement: c7nj04440b1.pdf [file c7nj04440b1.pdf]

## Supplementary Information

### **Molecular ordering of A(D-A'-D)<sub>2</sub>-based organic semiconductors through hydrogen bonding after simple cleavage of tert-butyloxycarbonyl protecting group<sup>†</sup>**

**Cuc Kim Trinh<sup>a,†</sup>, Hong-Joon Lee<sup>a,†</sup>, Jin-Woo Choi<sup>a</sup>, Mohamed Shaker<sup>a,b</sup>, Wonbin Kim<sup>a</sup> and Jae-Suk Lee<sup>\*a</sup>**

<sup>a</sup> School of Materials Science & Engineering, Research Institute for Solar and Sustainable Energies (RISE), Heeger Center for Advanced Materials, Advanced Photonics Research Institute (APRI), Gwangju Institute of Science and Technology, Gwangju 61005, Republic of Korea. E-mail: jslee@gist.ac.kr

<sup>b</sup> Chemistry Department, Faculty of Science, Tanta University, Tanta 31527, Egypt

## Supplementary Information

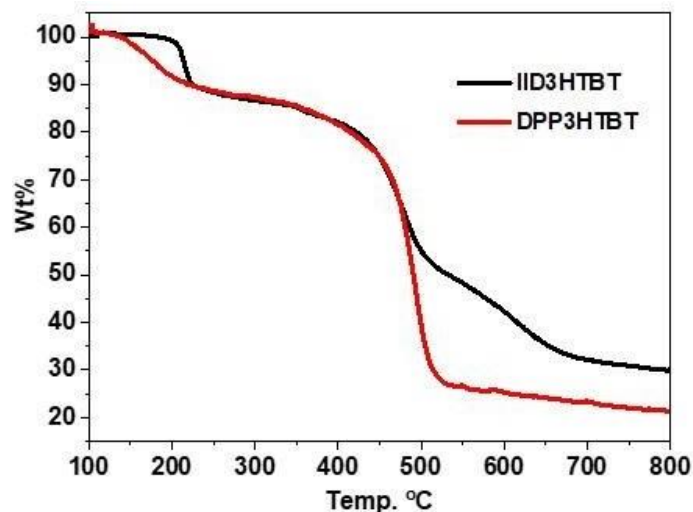

**Fig. S1** TGA curves of IID3HTBT and DPP3HTBT at a heating rate of 10 °C/min in N<sub>2</sub>. After the first decomposition at approximately 200 °C, the second decomposition peak at approximately 400 °C appeared for both of the small molecules, which indicates the molecules are thermally stable after the t-Boc groups are removed. In general, TGA revealed that the t-Boc groups in the two small molecules were removed at 200 °C, which allows the formation of H-bonds, increasing the crystallinity and improving the hole mobility in the devices.

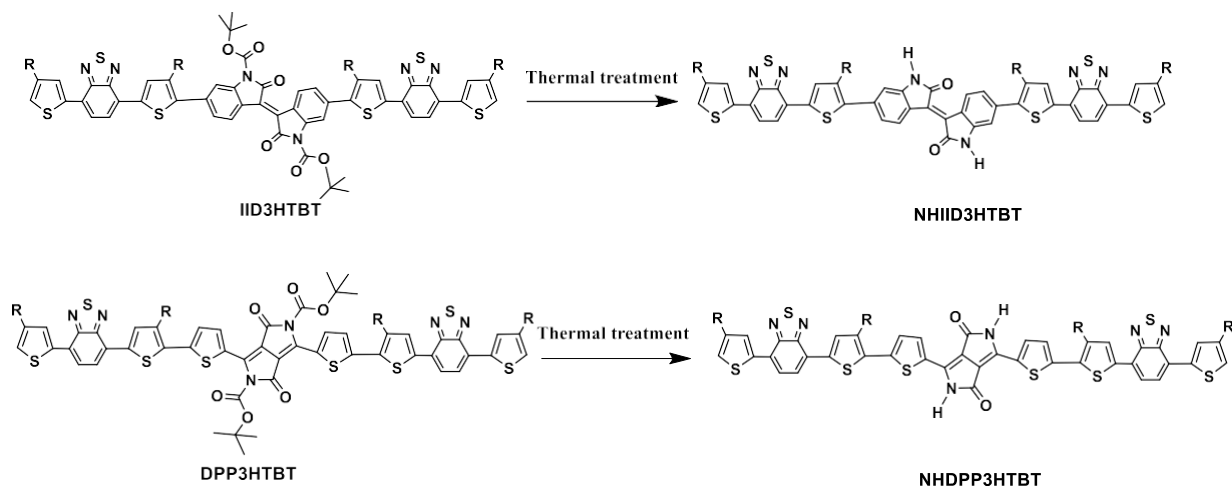

Scheme S1 Chemical structures of IID3HTBT and DPP3HTBT after thermal decarboxylation

## Supplementary Information

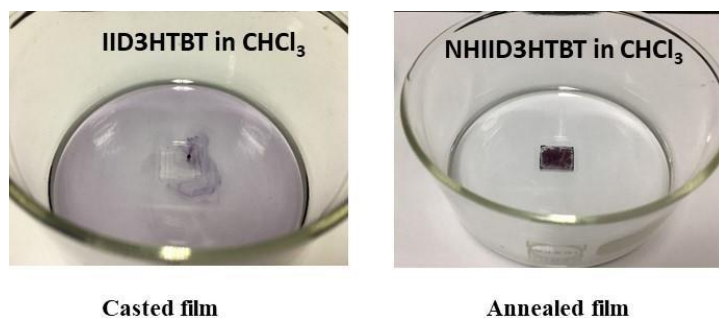

Fig. S2 Solvent resistant properties of IID3HTBT drop-casted thin films before and after thermal treatment in CHCl<sub>3</sub>. After thermal annealing at 200 °C for 30 min, due to the strong intermolecular interactions of N-H...O=C, the resulting annealed films were insoluble in most common solvents such as chloroform, DMSO, dichloromethane.

## Supplementary Information

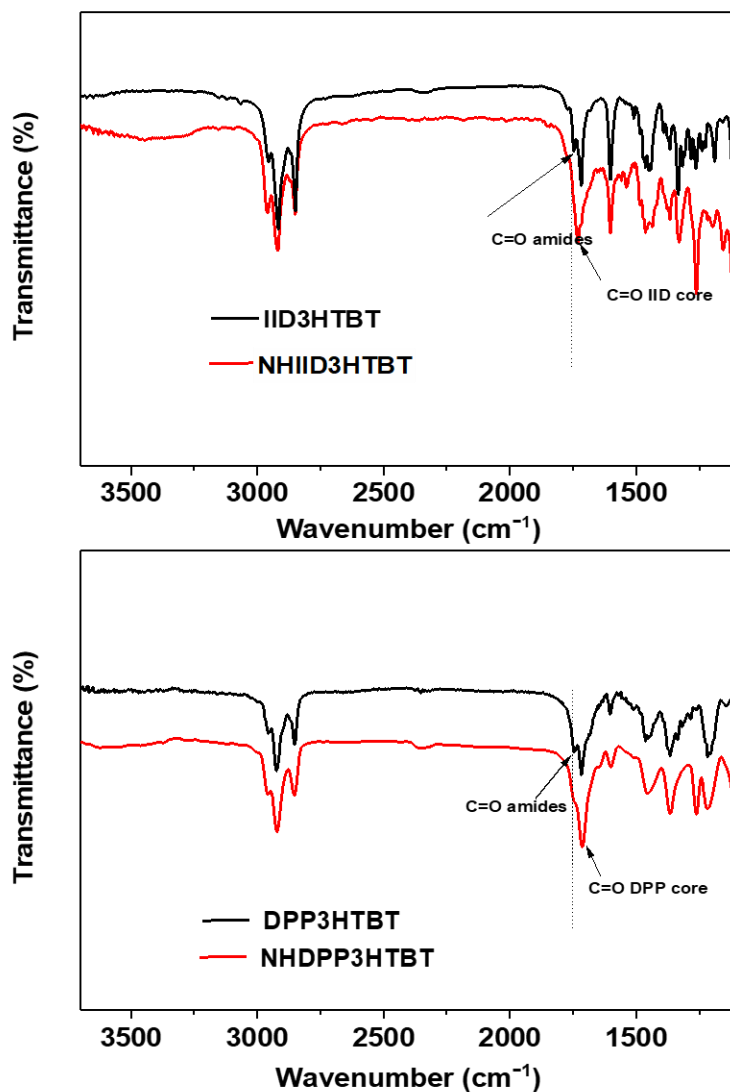

**Fig. S3** FT-IR spectra of IID3HTBT and DPP3HTBT before and after thermal decarboxylation. The peak attributable to the C=O group of t-Boc at  $\sim 1700\text{ cm}^{-1}$  disappeared after thermal treatment at  $200\text{ }^{\circ}\text{C}$  for 30 min. This proves that the t-Boc groups were removed completely. Moreover, new weak peaks from the regenerated NH groups between  $3200$  and  $3450\text{ cm}^{-1}$  appeared related to the formation of hydrogen bonds (N-H...O=C) after thermal decarboxylation.

## Supplementary Information

**Table S1** Optical and electrochemical properties of IID3HTBT and DPP3HTBT.

| Materials  | UV-vis Absorbance              |                                |                                   |                                     | Cyclic Voltammetry        |                           |
|------------|--------------------------------|--------------------------------|-----------------------------------|-------------------------------------|---------------------------|---------------------------|
|            | Solution                       |                                | Film                              |                                     | $E_{\text{HOMO}}$<br>(ev) | $E_{\text{LUMO}}$<br>(ev) |
|            | $\lambda_{\text{max}}$<br>(nm) | $\lambda_{\text{max}}$<br>(nm) | $\lambda_{\text{onset}}$<br>(nm ) | $E_{\text{g}}^{\text{opt}}$<br>(ev) |                           |                           |
| IID3HTBT   | 601                            | 698                            | 800                               | 1.55                                | -5.82                     | -3.91                     |
| NHIID3HTBT |                                | 549                            | 736                               | 1.68                                | -5.84                     | -3.88                     |
| DPP3HTBT   | 482                            | 528                            | 684                               | 1.81                                | -5.84                     | -3.79                     |
| NHDPP3HTBT |                                | 520                            | 679                               | 1.82                                | -5.81                     | -3.81                     |

## Supplementary Information

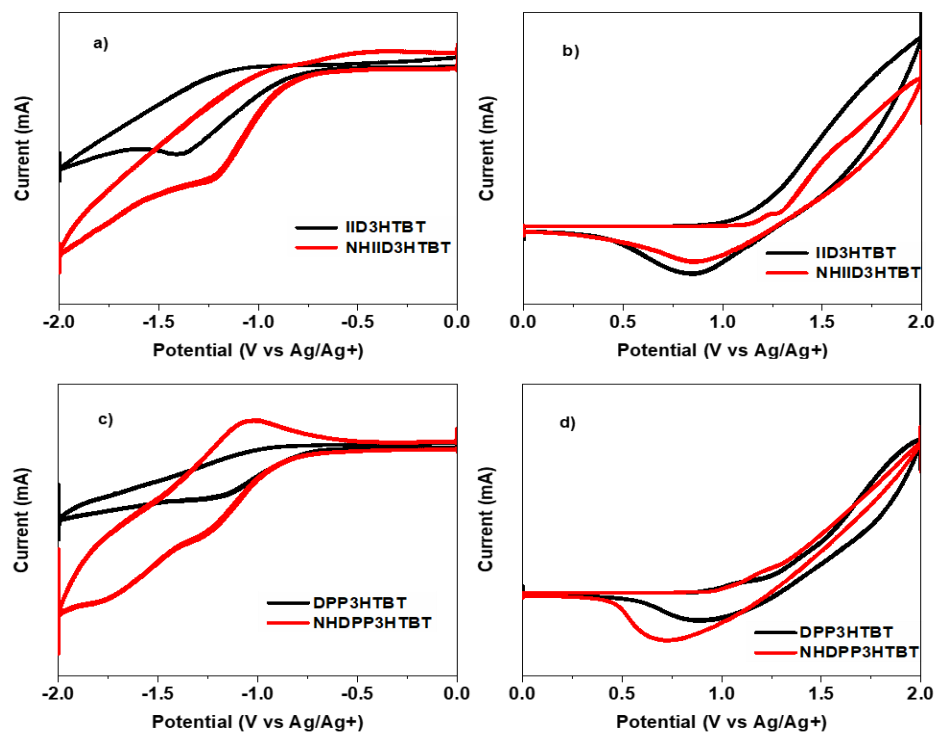

**Fig. S4** Cyclic voltammograms of small molecules before and after thermal decarboxylation. a) Reduction scan of IID3HTBT; b) oxidation scan of IID3HTBT; c) reduction scan of DPP3HTBT; and d) oxidation scan of DPP3HTBT. The oxidation and reduction potentials of all casted and annealed small molecules thin films on ITO glass were investigated in 0.1 M solution of TBAPF<sub>6</sub> in acetonitrile.

## Supplementary Information

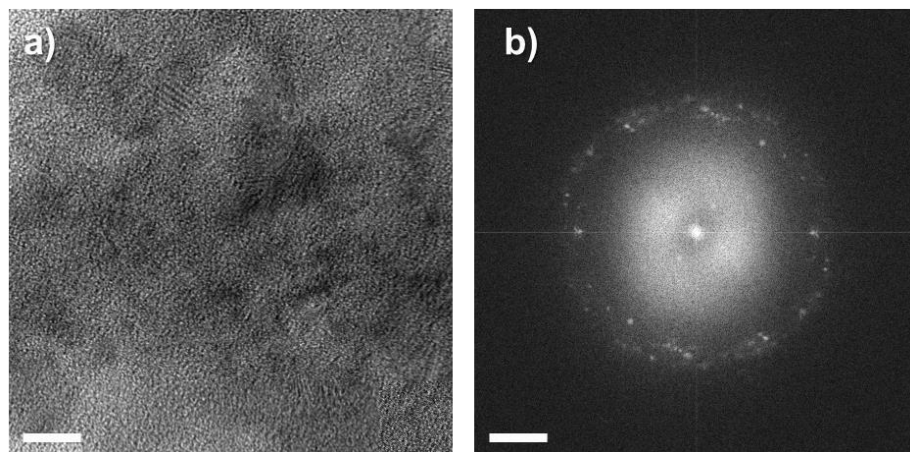

**Fig. S5** a) HRTEM and b) FFT images of IID3HTBT. Scale bars are 10 nm in a) and 2 nm<sup>-1</sup> in b).

## Supplementary Information

### Hole-only device

The charge transportation characteristics of the synthesized small molecules were evaluated in hole-only devices. The structure of hole only devices were ITO/ PEDOT:PSS/ small molecules/ MoO<sub>3</sub>/ Ag. As an example, Fig. S6 a) presents the current density–voltage (J–V) characteristics of the fabricated hole only devices with an IID3HTBT layer without thermal annealing.

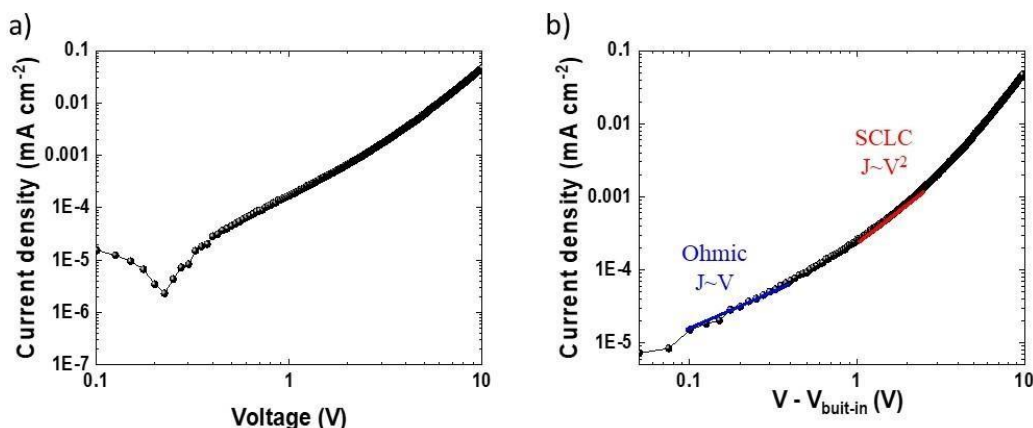

**Fig. S6** a) J–V characteristic of IID3HTBT without thermal annealing. b) J–V curve corrected by the built-in potential.

However, the J–V characteristic of hole only device does not show its minimum current value at 0 V. While our hole only device is using ITO and Ag as electrode for each side of the hole only device, asymmetry electrode generated internal built-in fields inside the hole only device.<sup>1,2</sup> Therefore, fitting process consisted correction term “V<sub>built-in</sub>”. The current level of hole only device will be minimized when the built-in potential counterbalanced by external field. Therefore, we assumed V<sub>built-in</sub> of 0.22 V from the Fig. S6 a). By assuming V<sub>built-in</sub> of 0.22 V, the shape of the J–V curve shows proper ohmic contact at low voltage region and space-charge-limited conduction (SCLC) characteristic at high voltage region (Fig. S6 b)). This ohmic characteristic shows that PEDOT:PSS and MoO<sub>3</sub> were proper hole injection layer for hole only devices. Fig. S7 presents the J–V characteristics of the fabricated hole-only device with an NHIID3HTBT, DPP3HTBT, and NHDPP3HTBT layer. Finally, the mobility extraction is done by calculate the measured data with the Mott–Gurney law in the high-voltage region where current follow a quadratic dependence on V–V<sub>built-in</sub>.<sup>3,4</sup>

## Supplementary Information

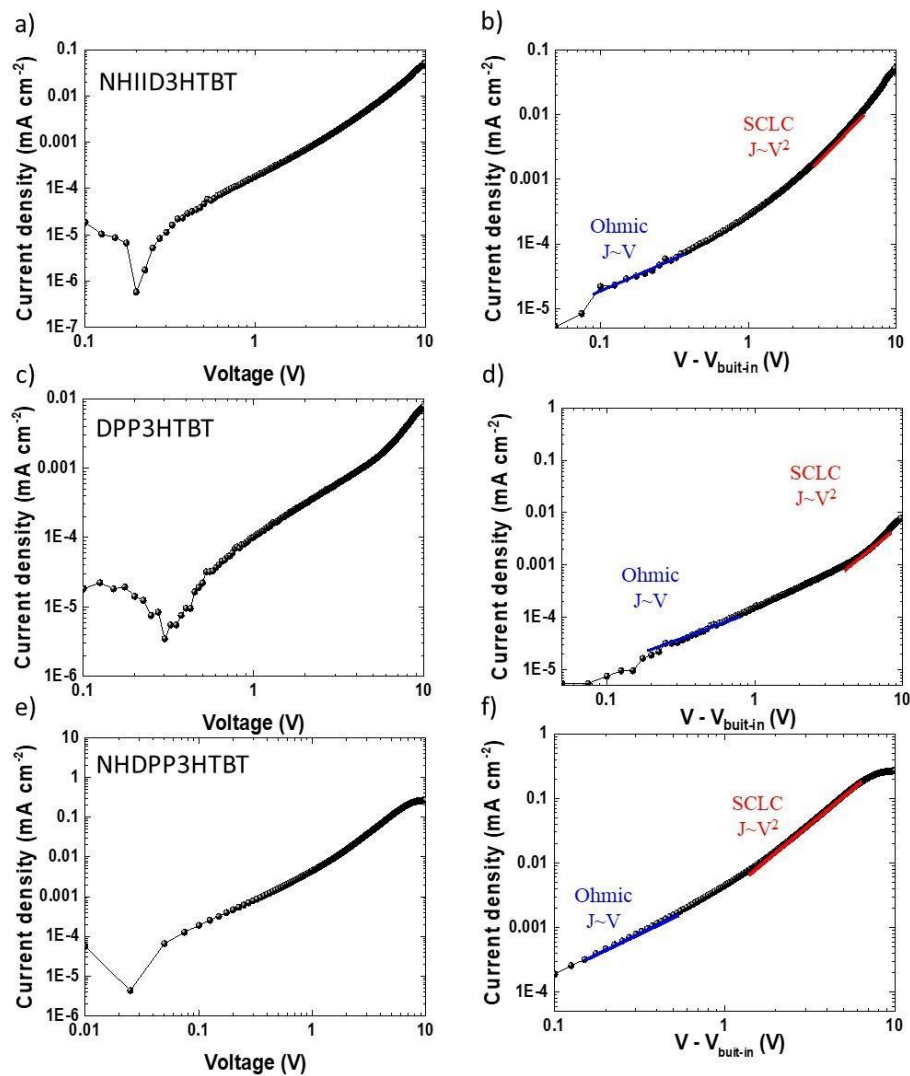

**Fig. S7** J-V characteristic of NHIID3HTBT, DPP3HTBT, NHDPP3HTBT; a), c), d) are measured data and b), d), f) are corrected data by built-in potential.

Table S2 Summary of HOD characterizations of IID3HBT and DPP3HTBT.

|                 | Hole Mobility ( $\text{cm}^2/\text{Vs}$ ) |                                         |
|-----------------|-------------------------------------------|-----------------------------------------|
|                 | As casted                                 | Annealed                                |
| <b>IID3HTBT</b> | <b><math>2.10 \times 10^{-6}</math></b>   | <b><math>6.20 \times 10^{-6}</math></b> |
| <b>DPP3HTBT</b> | <b><math>4.90 \times 10^{-6}</math></b>   | <b><math>6.10 \times 10^{-5}</math></b> |

## Supplementary Information

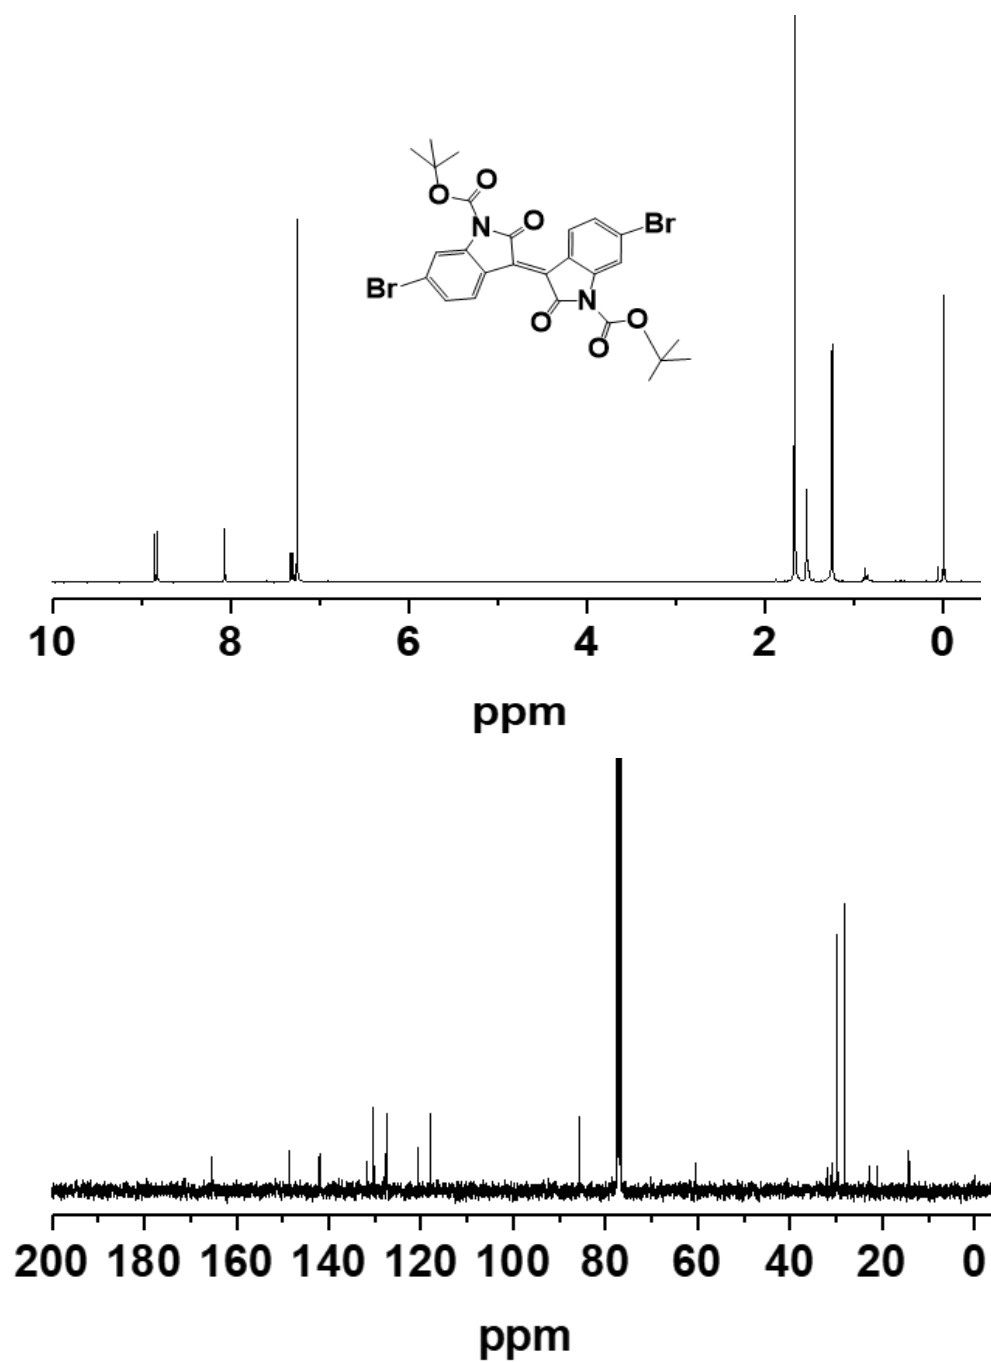

Fig. S8  $^1\text{H}$  and  $^{13}\text{C}$  NMR spectrum of compound 2 in  $\text{CDCl}_3$ .

## Supplementary Information

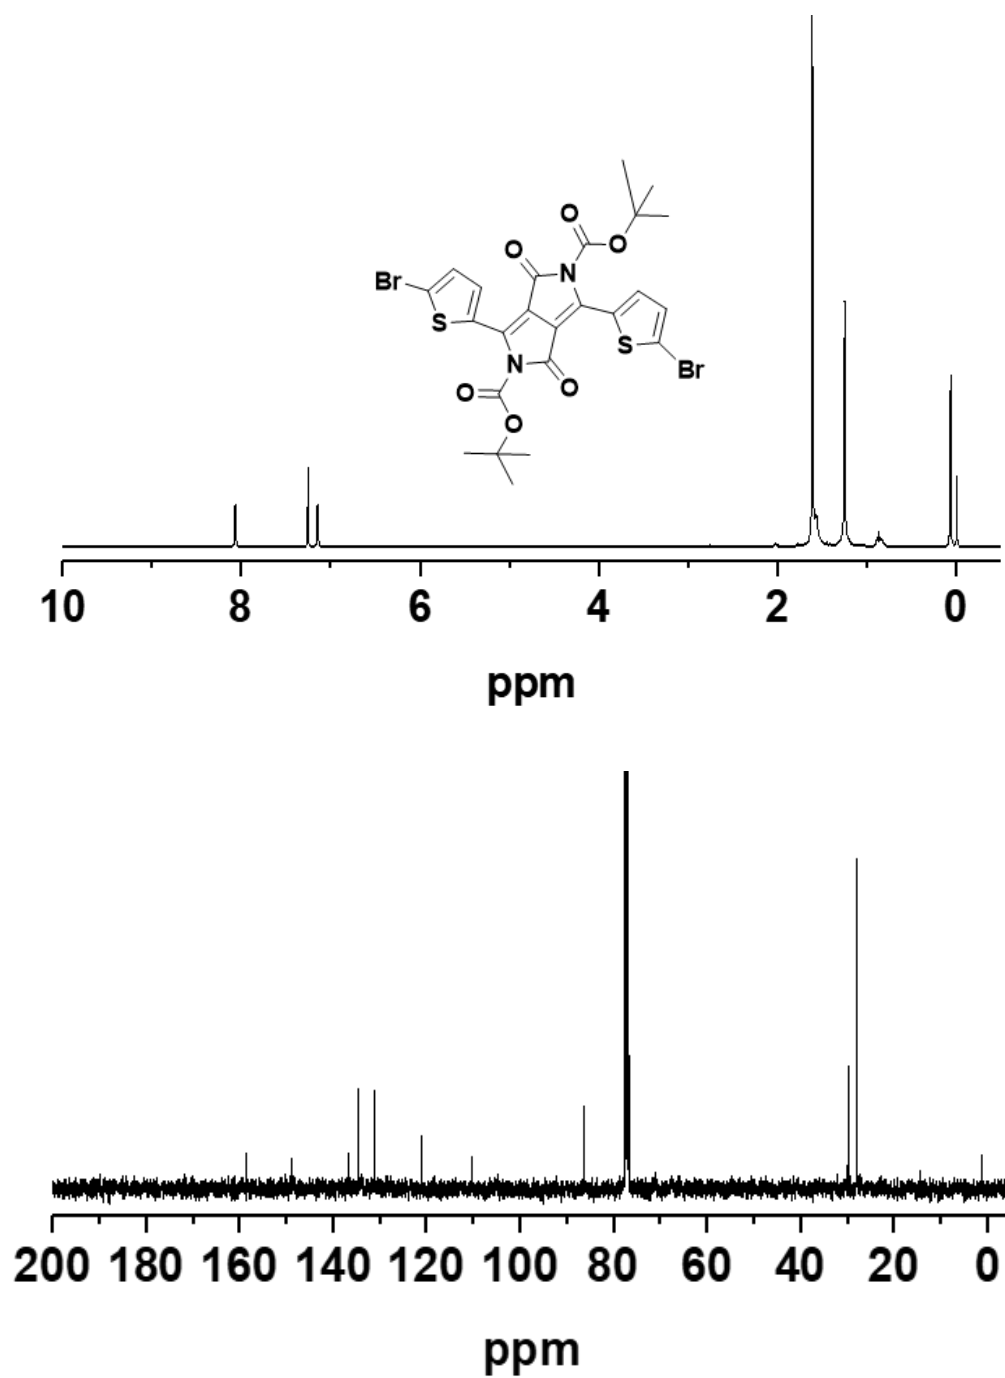

Fig. S9  $^1\text{H}$  and  $^{13}\text{C}$  NMR spectrum of compound 5 in  $\text{CDCl}_3$ .

## Supplementary Information

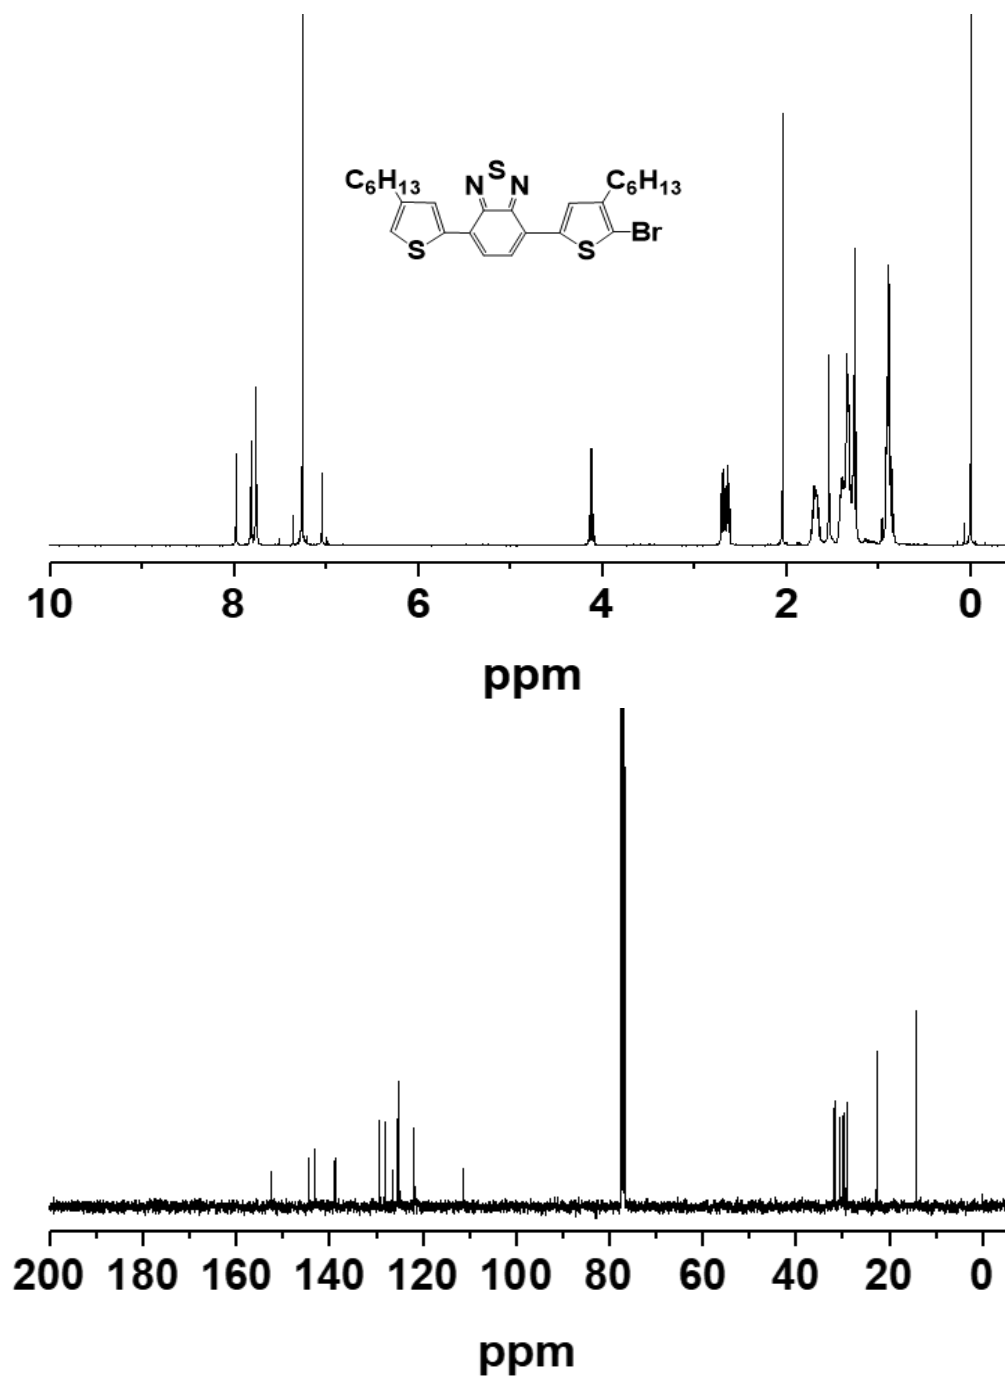

Fig. S10  $^1\text{H}$  and  $^{13}\text{C}$  NMR spectrum of compound 8 in  $\text{CDCl}_3$ .

# Supplementary Information

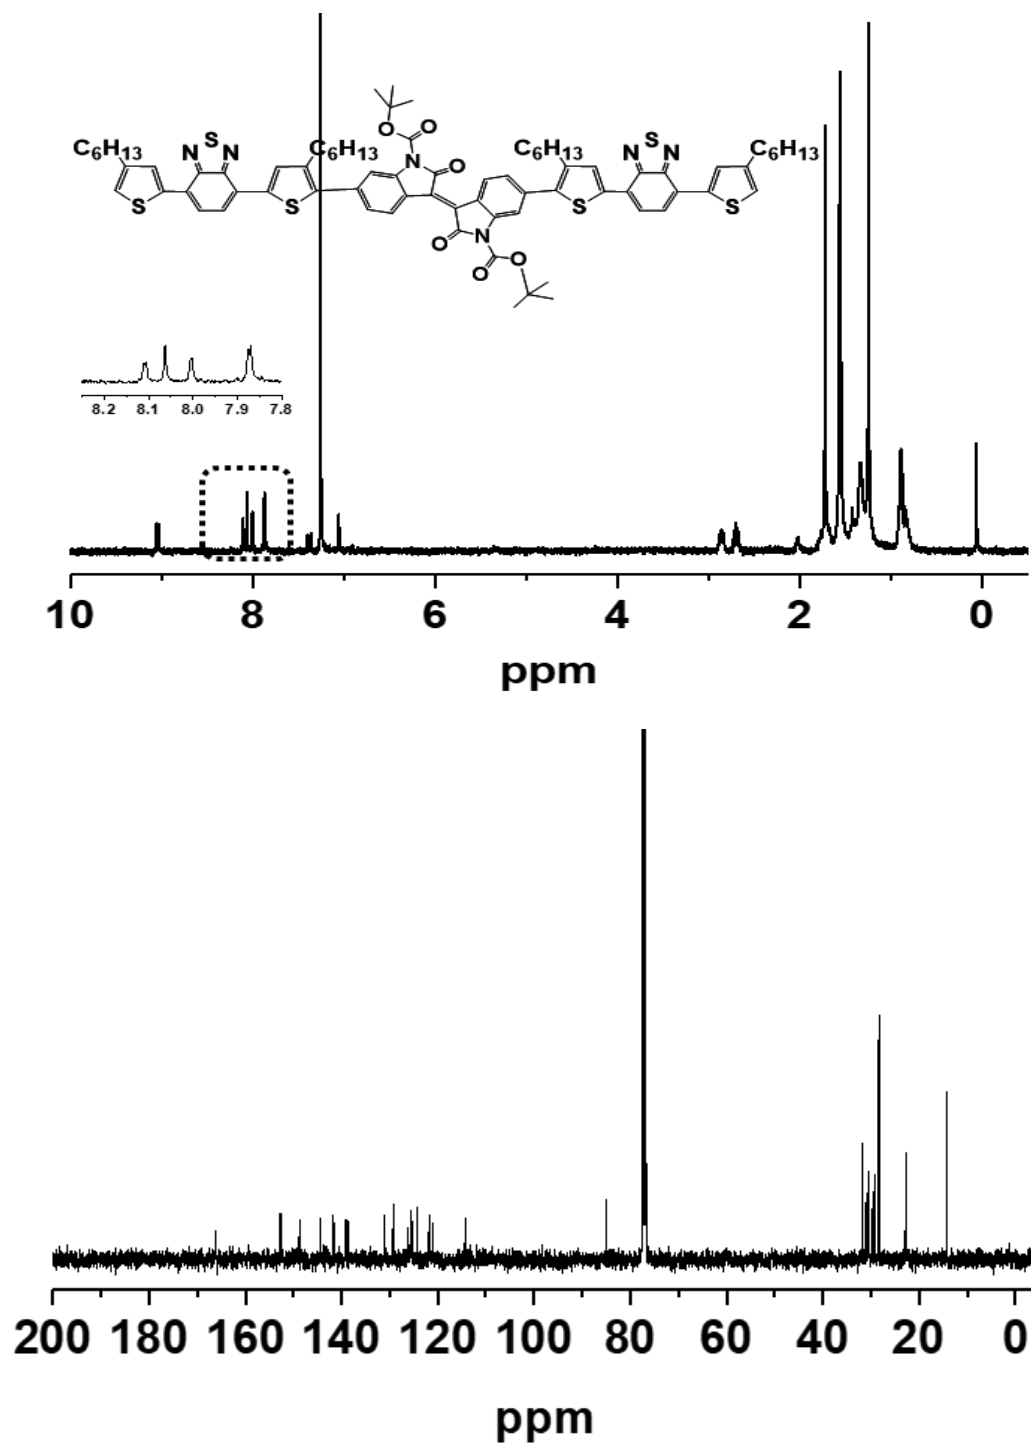

Fig. S11  $^1\text{H}$  and  $^{13}\text{C}$  NMR spectrum of IID3HTBT in  $\text{CDCl}_3$ .

## Supplementary Information

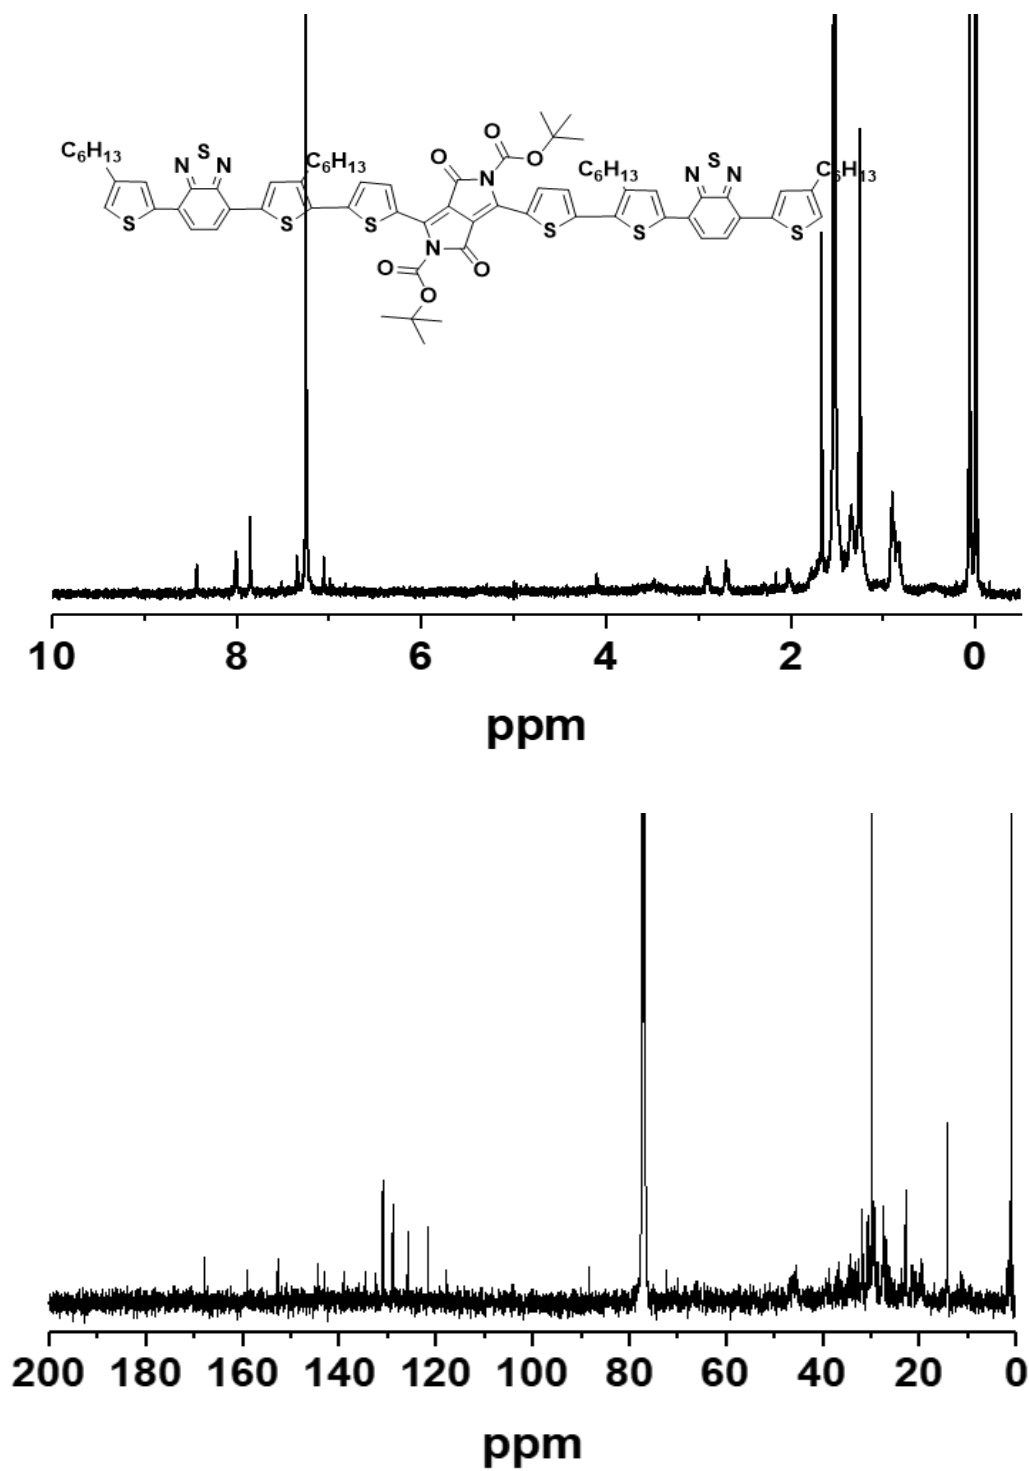

Fig. S12  $^1\text{H}$  and  $^{13}\text{C}$  NMR spectrum of DPP3HTBT in  $\text{CDCl}_3$ .

# Supplementary Information

## References

1. A. Kahn, N. Koch and W. Gao, *J. Polym. Sci., Part B: Polym. Phys.*, 2003, **41**, 2529
2. J. Hwang, A. Wan and A. Kahn, *Mater. Sci. Eng., R*, 2009, **64**, 1
3. M. Kiy, P. Losio, I. Biaggio, M. Koehler, A. Tapponnier and P. Gunter, *Appl. Phys. Lett.*, 2002, **80**, 1198
4. W. Chandra, L. K. Ang, K. L. Pey and C. M. Ng, *Appl. Phys. Lett.*, 2007, **90**, 153505
